# Supplementary material for: A Serratia marcescens PigP Homolog Controls Prodigiosin Biosynthesis, Swarming Motility and Hemolysis and Is Regulated by cAMP-CRP and HexS
Source: PubMed Central journal article supplement (PMC3585978; doi:10.1371/journal.pone.0057634), 2013-03-01
Supplement: pone.0057634.s001.pdf [file pone.0057634.s001.pdf]

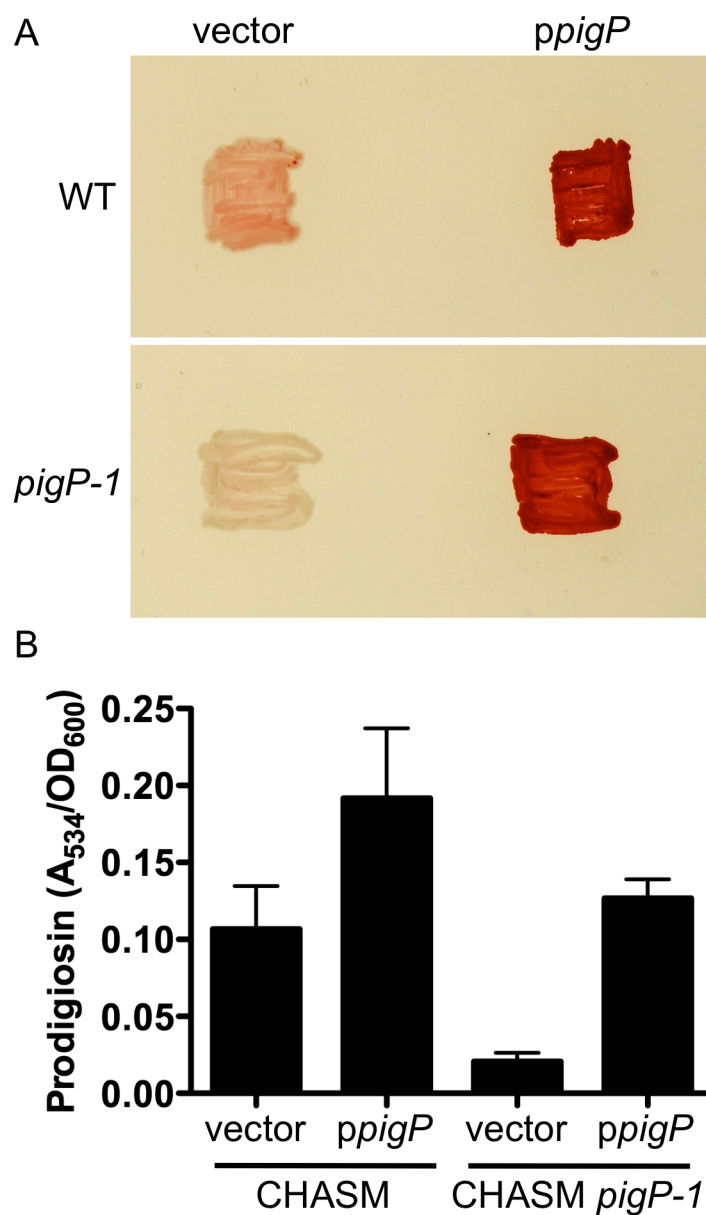

**Figure S1. Complementation of prodigiosin phenotype conferred by insertional mutation of *pigP*.** A. Photograph of WT (CMS376) or the *pigP* mutant (CMS836) with the vector (pMQ125) or *ppigP* (pMQ212) grown on LB agar supplemented with arabinose (4 mM). B. Prodigiosin production by the environmental isolate, CHASM, and isogenic *pigP*-insertion mutant (CMS2981) being either the empty vector (pMQ132) or *ppigP* (pMQ221) grown in LB medium. The average of six independent biological replicates is shown.
