# Supplementary material for: A Serratia marcescens PigP Homolog Controls Prodigiosin Biosynthesis, Swarming Motility and Hemolysis and Is Regulated by cAMP-CRP and HexS
Source: PubMed Central journal article supplement (PMC3585978; doi:10.1371/journal.pone.0057634), 2013-03-01
Supplement: pone.0057634.s002.pdf [file pone.0057634.s002.pdf]

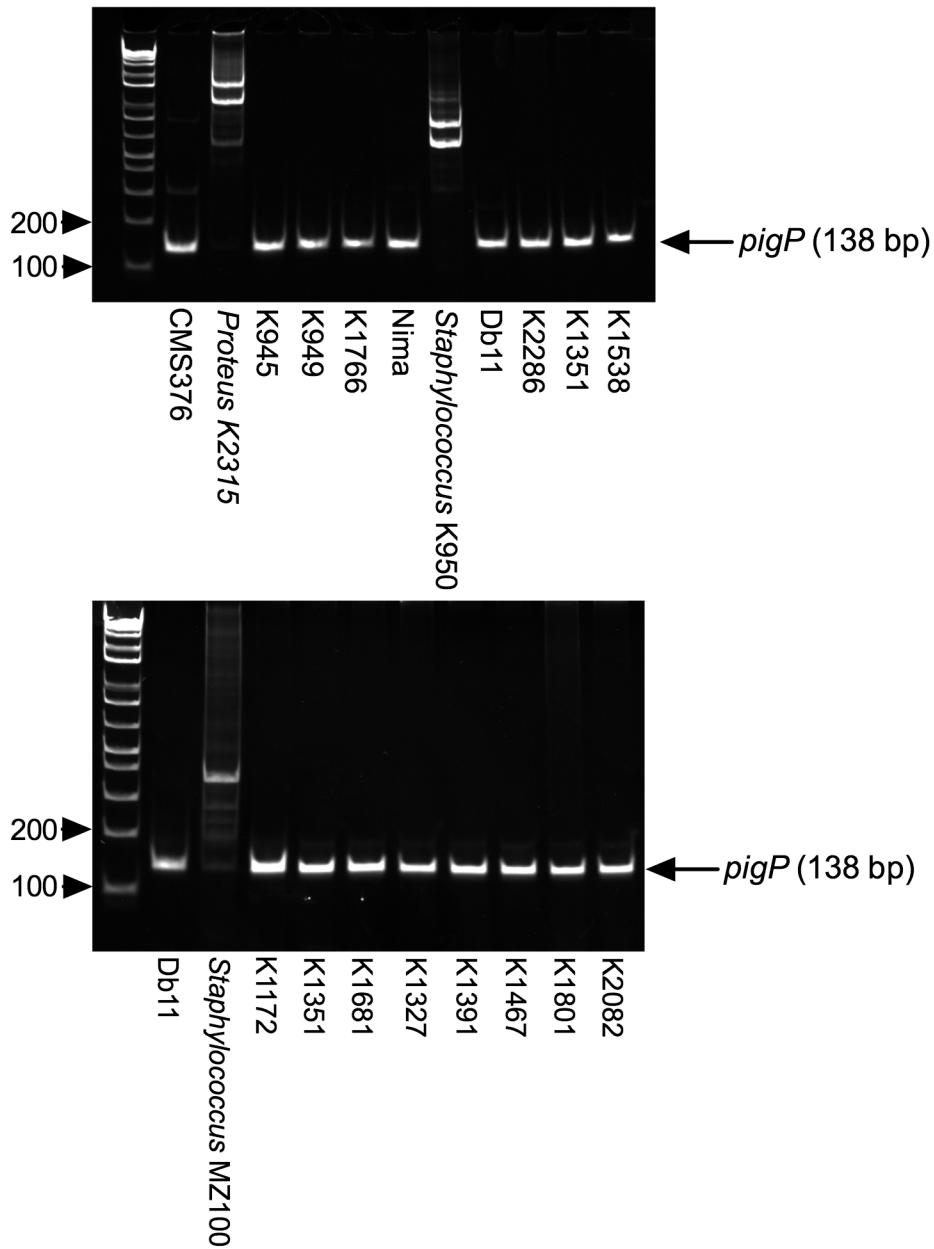

**Figure S2. Amplification of *pigP* from *S. marcescens* isolates.** PCR was used to amplify a 138 base pair amplicon from a variety of *S. marcescens* strains. Db11 and CMS376 served as positive controls, whereas *Proteus* and *Staphylococcus* chromosomal DNA served as negative controls. Amplicons were separated on TBE-PAGE gels and stained with ethidium bromide.
