# Supplementary material for: A Serratia marcescens PigP Homolog Controls Prodigiosin Biosynthesis, Swarming Motility and Hemolysis and Is Regulated by cAMP-CRP and HexS
Source: PubMed Central journal article supplement (PMC3585978; doi:10.1371/journal.pone.0057634), 2013-03-01
Supplement: pone.0057634.s003.pdf [file pone.0057634.s003.pdf]

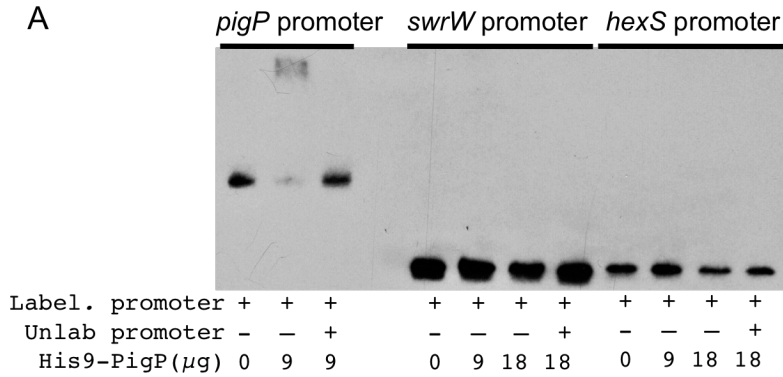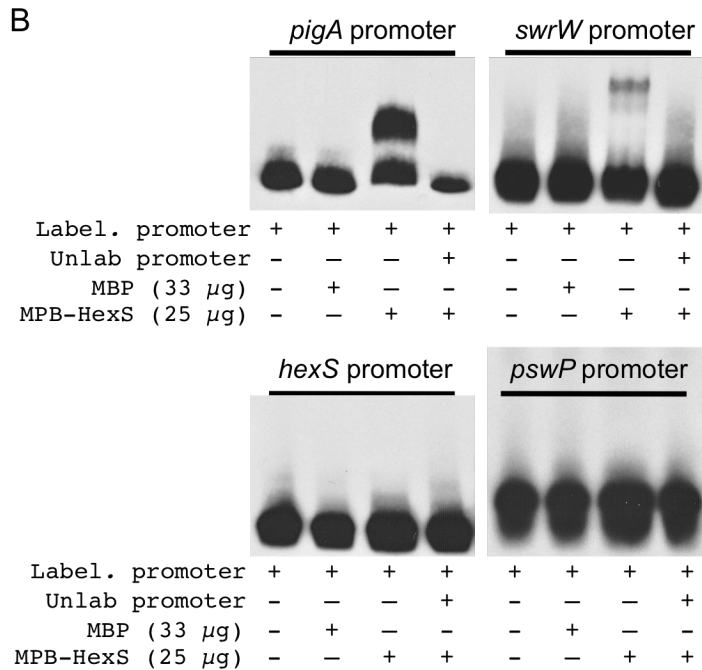

**Figure S3. EMSA analysis of His9-PigP and MBP-HexS with promoters of interest.**

A) His9-PigP exhibited a gel shift of the *pigP* promoter but not the *swrW* or *hexS* promoters. B) MPB-HexS retarded migration of *pigA* and *swrW* promoters (positive controls), but not the *pswP* promoter (negative control) or the *hexS* promoter. MBP alone did not induce a gel shift of any promoter. Excess unlabeled promoter DNA could compete successfully for MPB-HexS binding to *pigA* and *swrW* promoters. Biotin-labeled promoters (Label. Promoter) were used at 2 ng per reaction and unlabeled promoters (Unlab promoter) were used at 500 ng per reaction.
